# Supplementary material for: Unprecedented coordination of dithiocarbimate in multinuclear and heteroleptic complexes
Source: Royal Society of Chemistry journal article supplement (doi:10.1039/c0dt00582g), 2010-12-02
Supplement: c0dt00582g.pdf [file c0dt00582g.pdf]

## ELECTRONIC SUPPLEMENTARY INFORMATION

# Unprecedented coordination of dithiocarbamate in homodimetallic, trinuclear heterometallic and heteroleptic complexes: synthesis, crystal and molecular structures and properties†

Bandana Singh<sup>a</sup>, Michael G. B. Drew<sup>b</sup>, Gabriele Kociok-Kohn<sup>c</sup>, Kieran C. Molloy<sup>b</sup> and Nanhai Singh,<sup>\*‡<sup>a</sup></sup>

<sup>a</sup> Department of Chemistry, Faculty of Science, Banaras Hindu University, Varanasi 221005, India

E-mail: [nsingh@bhu.ac.in](mailto:nsingh@bhu.ac.in), Fax: 91 542 2368127 Tel: 91 542 2307321\*108

<sup>b</sup> Department of Chemistry, University of Reading, Whiteknights, Reading, RG6 6AD. U.K.

<sup>c</sup> Department of Chemistry, University of Bath, Bath, UK BA2 7AY

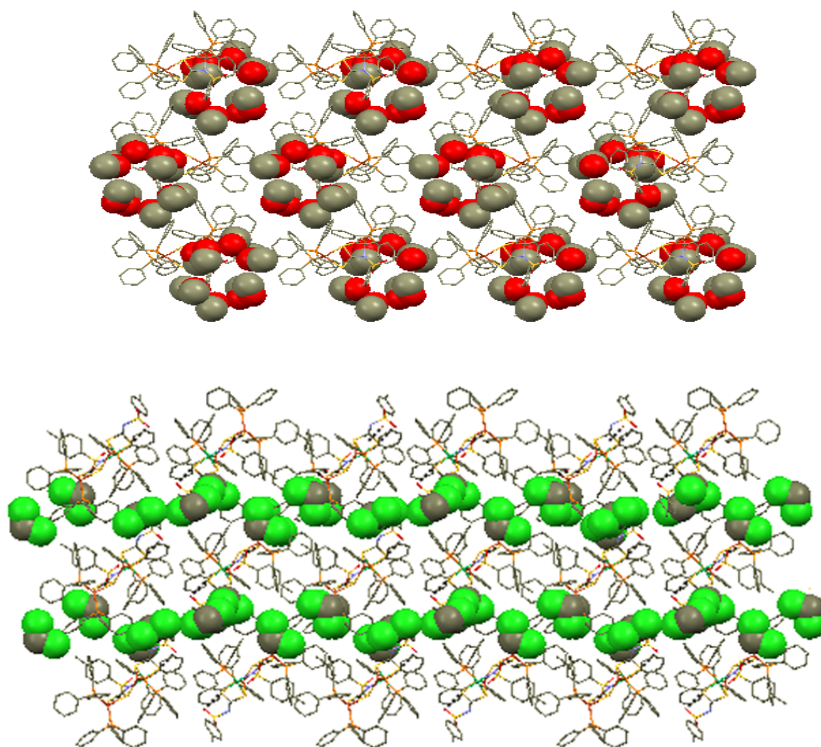

**Figure S1.** Molecular packing diagram of **1** (top) and **2** (bottom), showing the solvent molecules, methanol in **1** and dichloromethane in **2** as spheres, grey carbon, green chlorine, red oxygen. The solvent packing shows cavity like motif along the *a* axis in **1** and channel like motif along the *b* axis in **2**. Hydrogen atoms are omitted for clarity.

**Table S1.** Hydrogen bond geometry (Å, °) show inter- and intra- molecular interaction

| Complex  | D-H...A                         | D-H  | H...A | D...A | D-H...A |
|----------|---------------------------------|------|-------|-------|---------|
| <b>1</b> | O-H0...O2 <sup>a</sup>          | 0.82 | 2.32  | 2.813 | 119     |
|          | O3-H3A...O4                     | 0.82 | 1.94  | 2.753 | 170     |
|          | O4-H4A...O7                     | 0.82 | 1.92  | 2.702 | 158     |
|          | O6-H6A...O3                     | 0.82 | 2.21  | 2.890 | 140     |
|          | O7-H7A...O1 <sup>b</sup>        | 0.82 | 2.26  | 2.840 | 128     |
|          | C4-H4...O1                      | 0.93 | 2.53  | 2.907 | 105     |
|          | O7-H7A...S1 <sup>a</sup>        | 0.82 | 2.92  | 3.664 | 148     |
| <b>2</b> | C90-H90B...O2 <sup>c</sup>      | 0.97 | 2.70  | 3.281 | 144     |
|          | C89-H89A...O3 <sup>d</sup>      | 0.97 | 2.66  | 3.159 | 111     |
|          | C91-H91A...O4 <sup>d</sup>      | 0.96 | 2.70  | 3.647 | 164     |
|          | C34-H34...N1 <sup>d</sup>       | 0.92 | 2.44  | 3.323 | 157     |
|          | C81-H81...S4 <sup>e</sup>       | 0.92 | 2.96  | 3.847 | 160     |
|          | C89-H89B...S2 <sup>f</sup>      | 0.97 | 2.86  | 3.641 | 137     |
|          | C43-H43...Cl6 <sup>d</sup>      | 0.93 | 2.90  | 3.694 | 143     |
| <b>3</b> | C(20)–H(20)...S(2) <sup>a</sup> | 0.95 | 2.93  | 3.682 | 136     |
|          | C(30)–H(30)...O(2) <sup>a</sup> | 0.95 | 2.64  | 3.415 | 138     |
|          | C(42)–H(42)...O(2) <sup>g</sup> | 0.95 | 2.41  | 3.329 | 162     |
| <b>4</b> | C(20)–H(20)...S(2) <sup>a</sup> | 0.95 | 2.90  | 3.661 | 138     |
|          | C(30)–H(30)...O(2) <sup>a</sup> | 0.95 | 2.66  | 3.435 | 130     |
|          | C(42)–H(42)...O(2) <sup>g</sup> | 0.95 | 2.41  | 3.332 | 163     |

Symmetry code: <sup>a</sup> = x, -1+y, z; <sup>b</sup> = x, 3/2-y, -1/2+z; <sup>c</sup> = x, 1+y, z; <sup>d</sup> = 1+x, y; <sup>e</sup> = 1-x, -y; <sup>f</sup> = -x, -y, 2-z; <sup>g</sup> = 1+x, -1+y, z.

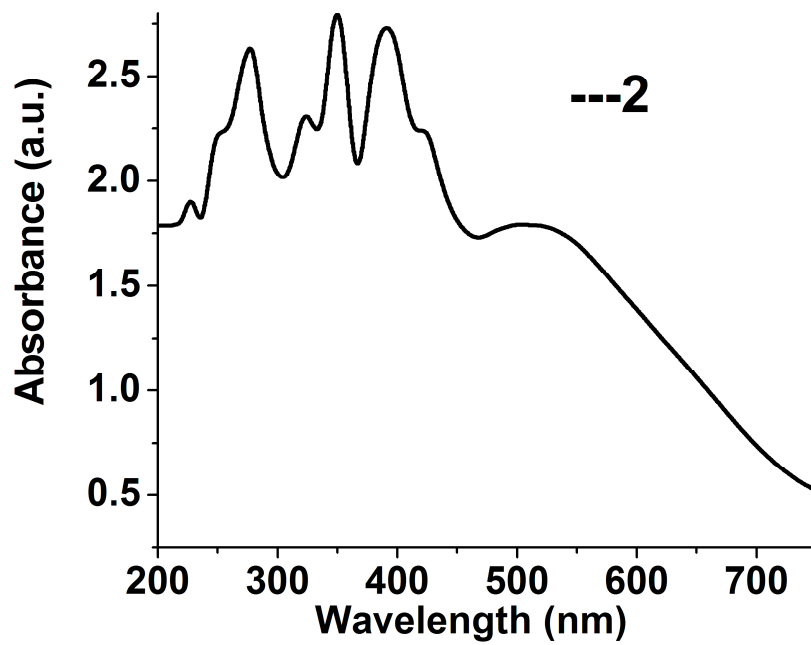

**Figure S2.** Electronic absorption spectra (as solid) in nujol mull of complex 2.
